# Supplementary material for: Comparing mouse and human cingulate cortex organization using functional connectivity
Source: Springer Nature journal article supplement (doi:10.1007/s00429-024-02773-9), 2024-05-13
Supplement: MOESM1 [file 27084300]

Supplementary material for

Comparing mouse and human cingulate cortex organization using functional connectivity

Aran T.B. van Hout<sup>1</sup>, Sabrina van Heukelum<sup>1</sup>, Matthew F.S. Rushworth<sup>2,3</sup>,  
Joanes Grandjean<sup>1,4\*</sup>, Rogier B. Mars<sup>1,2\*</sup>

\* shared last authors

<sup>1</sup>Donders Institute for Brain, Cognition and Behaviour, Radboud University Nijmegen, Nijmegen, The Netherlands

<sup>2</sup>Wellcome Centre for Integrative Neuroimaging, Nuffield Department of Clinical Neurosciences, John Radcliffe Hospital, University of Oxford, Oxford, United Kingdom

<sup>3</sup>Department of Experimental Psychology, University of Oxford, Oxford, United Kingdom

<sup>4</sup>Department for Medical Imaging, Radboud University Medical Center, Nijmegen, The Netherlands

Correspondence:

Rogier B. Mars  
Donders Centre for Cognition  
Thomas van Acquinostraat 4  
6525 GD Nijmegen  
The Netherlands  
Rogier.mars@donders.ru.nl

Supplementary material A: Mouse and human cingulate seed areas

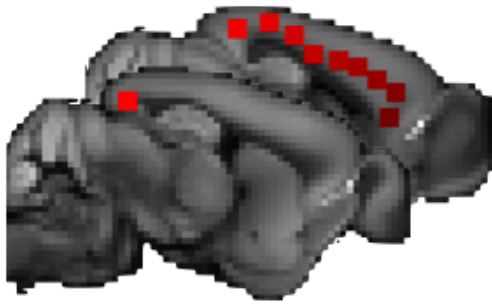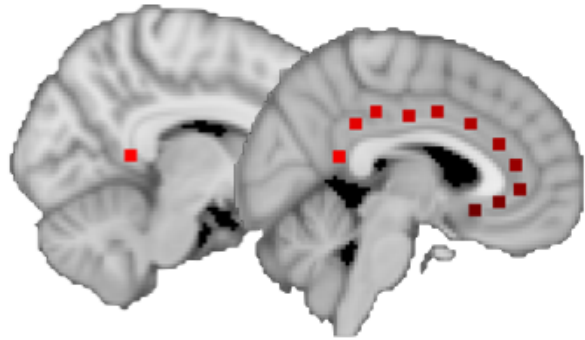

## Supplementary material B: Four component ICA solution for mouse tracer data

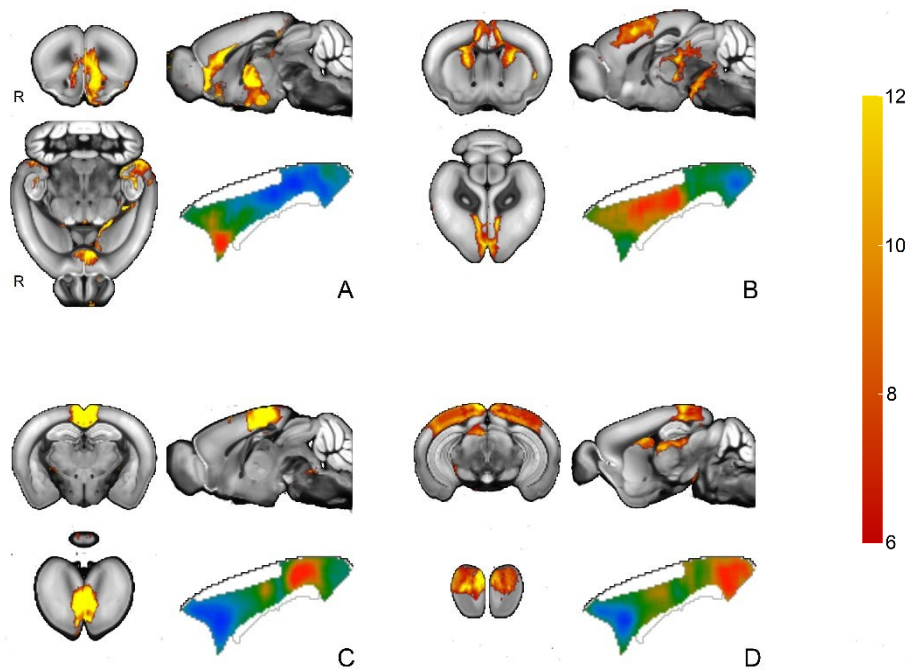

Each mix figure represents the normalised contributions of seeds to the ICA component (blue: low contribution, red: high contribution) The four components include: 25/32 component (panel A), the secondary motor component (panel B), the retrosplenial area component (panel C), and the visual component (panel D).

### Supplementary material C: Nine component ICA solution for the mouse tracer data

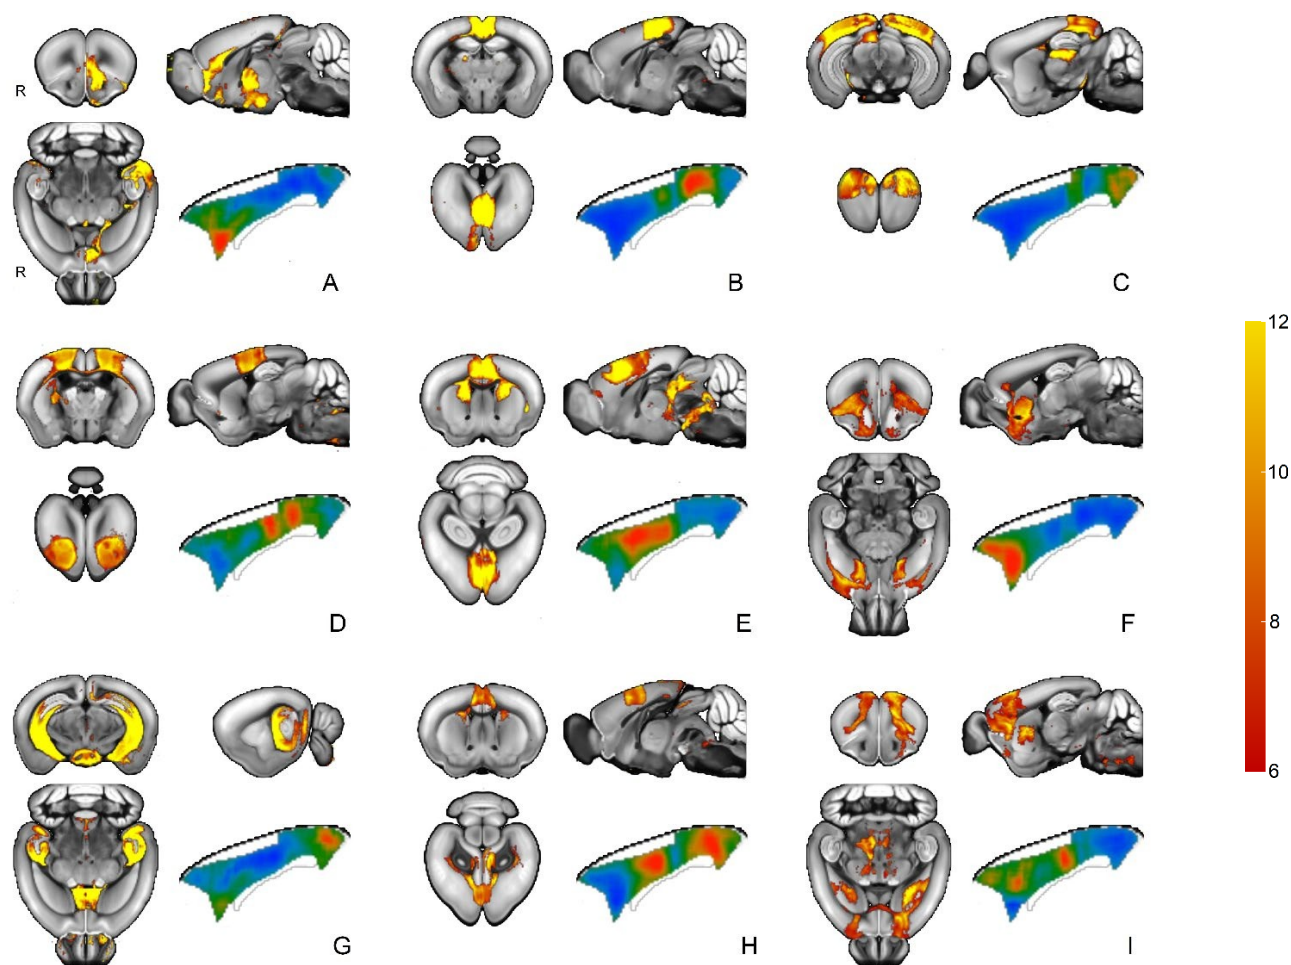

Each mix figure represents the normalised contributions of seeds to the ICA component (blue:low contribution, red: high contribution) The nine components include: area 25/32 component (A), the retrosplenial area component (B), the visual component (C), the secondary motor area component (D), the area 24/24' component (E), orbital/insula component (F), the hippocampal component (G), the area 24' component (H), and the orbital/secondary motor component (I).

Supplementary material D: Additional mouse cingulate seeds resting state fMRI connectivity maps

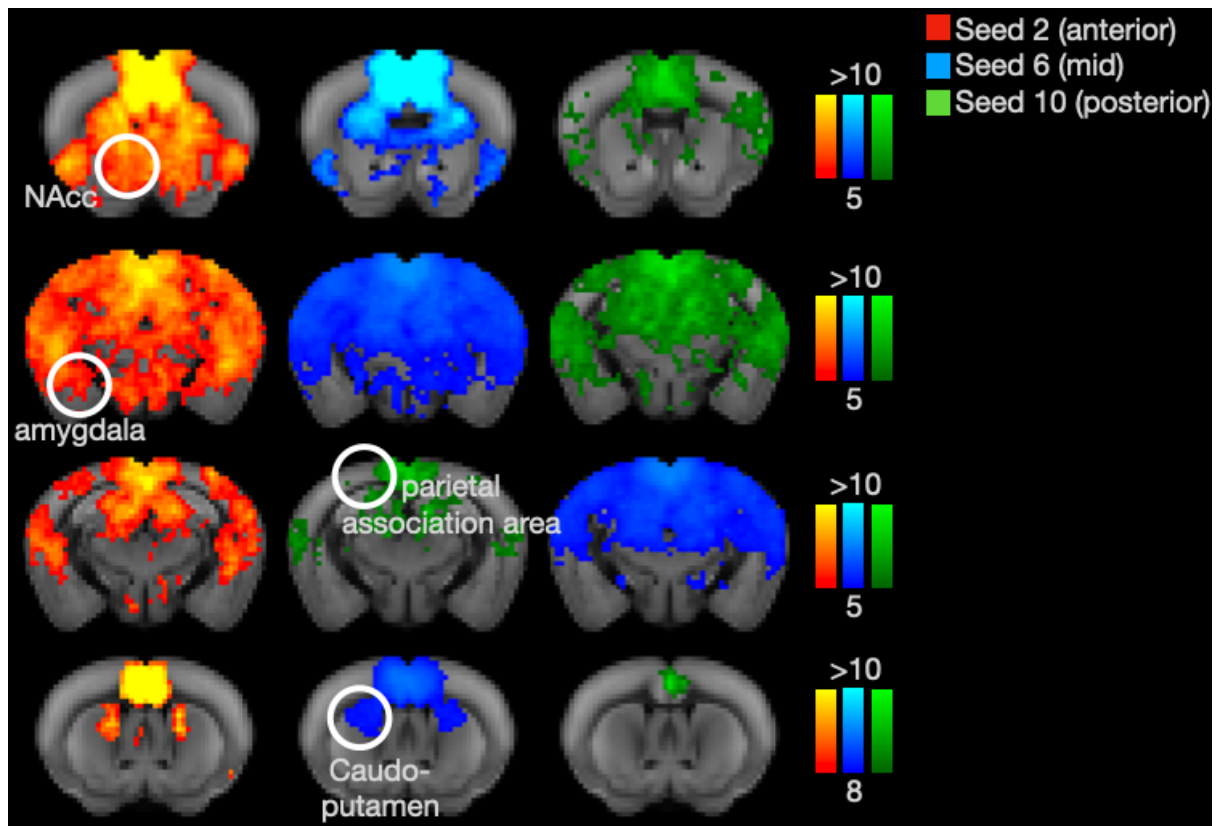

Connectivity of mouse anterior, mid-, and posterior cingulate seeds. Color strengths indicate z-statistics.
